# Supplementary material for: Elucidation and Regulation of Polyphenols in the Smoking Process of Shanxi Aged Vinegar
Source: MDPI journal article supplement (doi:10.3390/foods10071518), 2021-07-01
Supplement: s1 [file s1]

**Table S1.** Structural formula of polyphenols during the smoking process of Shanxi aged vinegar.

| Polyphenols | CAS Number | Compound Identification                                                            | Structure |
|-------------|------------|------------------------------------------------------------------------------------|-----------|
| 1           | 121-33-5   | 4-Hydroxy-3-methoxy-benzaldehyde (Vanillin)                                        |           |
| 2           | 121-34-6   | 4-Hydroxy-3-methoxy-benzoic acid (Vanillic acid)                                   |           |
| 3           | 537-98-4   | (2E)-3-(4-Hydroxy-3-methoxyphenyl)-2-propenoic acid ((E)-Ferulic acid)             |           |
| 4           | 501-98-4   | (E)-3-(4-hydroxyphenyl)-2-propenoic acid ((E)-4-Hydroxycinnamic acid)              |           |
| 5           | 99-96-7    | 4-Hydroxybenzoic acid                                                              |           |
| 6           | 93376-04-6 | (3R,4R)-Dihydro-3,4-bis[(3-hydroxy-4-methoxyphenyl) methyl]-2(3H)-furanone         |           |
| 7           | 55-10-7    | 4-Hydroxy-3-methoxymandelic acid                                                   |           |
| 8           | 40979-91-7 | 1-(3-Hydroxy-4-methoxyphenyl)-1,2-ethanediol                                       |           |
| 9           | 99-10-5    | 3,5-Dihydroxybenzoic acid                                                          |           |
| 10          | 3943-96-2  | (E)-3-(3-hydroxyphenyl) acrylic acid ethyl ester                                   |           |
| 11          | 1135-23-5  | 3-(4-Hydroxy-3-methoxyphenyl) propionic acid (Dihydroferulic acid)                 |           |
| 12          | 102-32-9   | 3,4-Dihydroxybenzeneacetic acid (Homoprotocatechuic acid)                          |           |
| 13          | 154-23-4   | (2R,3S)-2-(3,4-Dihydroxyphenyl)-3,4-dihydro-2H-1-benzopyran-3,5,7-triol (Catechin) |           |

**Table S2.** Variations of types and contents of amino acids and reducing sugars during the smoking process of Shanxi aged vinegar.

| Compounds | Smoking (mg/g Pei) |              |              |              |              |
|-----------|--------------------|--------------|--------------|--------------|--------------|
|           | 1 day              | 2 day        | 3 day        | 4 day        | 5 day        |
| Asp       | 0.44 ± 0.06        | 0.41 ± 0.01  | 0.42 ± 0.02  | 0.54 ± 0.01  | 0.49 ± 0.02  |
| Thr       | 0.39 ± 0.01        | 0.41 ± 0.05  | 0.36 ± 0.03  | 0.13 ± 0.03  | 0.12 ± 0.05  |
| Ser       | 0.52 ± 0.01        | 0.32 ± 0.02  | 0.31 ± 0.03  | 0.28 ± 0.04  | 0.18 ± 0.05  |
| Glu       | 0.97 ± 0.04        | 0.80 ± 0.03  | 0.58 ± 0.02  | 0            | 0            |
| Gly       | 0.37 ± 0.01        | 0.31 ± 0.03  | 0.27 ± 0.02  | 0.36 ± 0.05  | 0.31 ± 0.03  |
| Ala       | 1.73 ± 0.03        | 1.49 ± 0.04  | 1.19 ± 0.05  | 1.52 ± 0.02  | 1.42 ± 0.02  |
| Cys       | 1.36 ± 0.12        | 0.94 ± 0.01  | 1.20 ± 0.04  | 1.19 ± 0.02  | 1.11 ± 0.02  |
| Val       | 0.84 ± 0.01        | 0.68 ± 0.03  | 0.59 ± 0.04  | 0.64 ± 0.02  | 0.63 ± 0.03  |
| Ile       | 0.51 ± 0.01        | 0.38 ± 0.03  | 0.35 ± 0.04  | 0.31 ± 0.01  | 0.32 ± 0.04  |
| Leu       | 1.00 ± 0.03        | 0.78 ± 0.03  | 0.66 ± 0.05  | 0.46 ± 0.04  | 0.53 ± 0.05  |
| Phe       | 0.49 ± 0.02        | 0.38 ± 0.01  | 0.28 ± 0.05  | 0.26 ± 0.03  | 0.26 ± 0.05  |
| His       | 0.55 ± 0.04        | 0.56 ± 0.01  | 0.49 ± 0.04  | 0.49 ± 0.05  | 0.55 ± 0.03  |
| Lys       | 0.32 ± 0.02        | 0.21 ± 0.05  | 0.19 ± 0.04  | 0.31 ± 0.04  | 0.11 ± 0.01  |
| Xylose    | 15.43 ± 0.55       | 14.05 ± 0.46 | 13.01 ± 0.02 | 12.76 ± 0.23 | 12.95 ± 0.24 |
| Fructose  | 7.79 ± 0.03        | 7.87 ± 0.02  | 7.68 ± 0.01  | 7.70 ± 0.04  | 7.69 ± 0.01  |
| Mannose   | 10.18 ± 0.04       | 11.35 ± 0.42 | 11.77 ± 0.18 | 13.09 ± 0.18 | 11.49 ± 0.55 |
| Glucose   | 1.08 ± 0.04        | 1.80 ± 0.02  | 0.70 ± 0.01  | 0.66 ± 0.01  | 0.63 ± 0.01  |
| Maltose   | 26.63 ± 0.19       | 30.94 ± 0.20 | 23.50 ± 0.09 | 23.38 ± 0.01 | 23.37 ± 0.01 |
